# Supplementary material for: CTAB assisted synthesis of ultra-high aspect ratio 3Mg(OH)2·MgCl2·8H2O nanowires
Source: Royal Society of Chemistry journal article supplement (doi:10.1039/d2nj05624k), 2023-01-01
Supplement: d2nj05624k2.pdf [file d2nj05624k2.pdf]

**Supplementary Information for**  
**CTAB assisted synthesis of ultra-high aspect ratio  $3\text{Mg}(\text{OH})_2 \cdot \text{MgCl}_2 \cdot 8\text{H}_2\text{O}$**   
**nanowires**

Lu Gong,<sup>a</sup> Zhenying Yao,<sup>a</sup> Chunmei Zhu,<sup>a</sup> Lan Xiang,<sup>b</sup> Xin Lian,<sup>a</sup> Bai He,<sup>a</sup> Baoyan Fan<sup>c</sup>, and  
Bo Yu\*,<sup>a</sup>

<sup>a</sup> School of Chemistry and Chemical Engineering, Chongqing University of Science and  
Technology, Chongqing 401331, China

<sup>b</sup> Department of Chemical Engineering, Tsinghua University, Beijing 100084, China

<sup>c</sup> School of Metallurgy and Materials Engineering, Chongqing University of Science and  
Technology, Chongqing 401331, China

\* Corresponding Author

**The FDF file includes:**

Figures S1 to S2  
Tables S1 to S3

**Other supplementary information for this manuscript includes the following.**

Movie S1



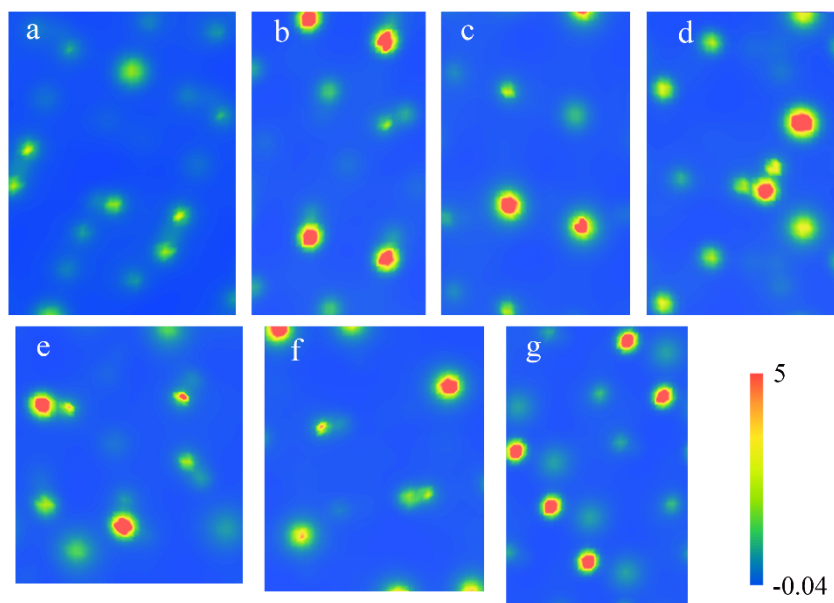

**Figure S2.** Projection of electrostatic potential on the isosurface of electron density of different crystal surfaces a (-

1 0 1), b (0 0 1), c (0 1 -1), d (0 1 0), e (1 1 -1), f (1 1 0), g (1 0 0).

---

**Table S1.** SAED spectrum calibration calculation

|       | pixel<br>distance | Diffraction pattern distance<br>(1/nm) | crystalplane spacing (Å) |
|-------|-------------------|----------------------------------------|--------------------------|
| ruler | 231               | 5                                      | --                       |
| A     | 164.35            | 3.55                                   | 2.81                     |
| B     | 129.02            | 2.79                                   | 3.58                     |
| C     | 169.61            | 3.67                                   | 2.72                     |

---

**Table. S2** BFDH morphology calculation

| <i>hkl</i> | Multiplicity | $d_{hkl}$ | Distance | Total facet area | Total facet area % |
|------------|--------------|-----------|----------|------------------|--------------------|
| (1 0 0)    | 2            | 8.122     | 12.311   | 1332.924         | 31.074             |
| (0 0 1)    | 2            | 7.129     | 14.025   | 1106.606         | 25.798             |
| (-1 0 1)   | 2            | 5.963     | 16.769   | 327.490          | 7.634              |
| (0 1 0)    | 2            | 5.935     | 16.847   | 745.302          | 17.375             |
| (1 1 0)    | 2            | 5.497     | 18.189   | 360.965          | 8.415              |
| (1 1 -1)   | 2            | 5.059     | 19.763   | 278.153          | 6.484              |
| (0 1 -1)   | 2            | 4.934     | 20.263   | 137.949          | 3.216              |

---

---

**Table. S3** The Interaction energy calculation results

| crystal face | Total energy<br>(kcal/mol) | Surface energy<br>(kcal/mol) | CTAB energy<br>(kcal/mol) | Interaction energy<br>(kcal/mol) |
|--------------|----------------------------|------------------------------|---------------------------|----------------------------------|
| (1 0 0)      | -5994.983                  | -6122.958                    | 129.396                   | -1.421                           |
| (0 0 1)      | -5882.573                  | -5983.343                    | 129.396                   | -28.626                          |
| (0 1 0)      | -47734.05                  | -47844.917                   | 129.396                   | -18.529                          |
| (1 1 0)      | -46381.205                 | -46469.097                   | 129.396                   | -41.504                          |
| (-1 0 1)     | -11640.695                 | -11698.479                   | 129.396                   | -71.612                          |
| (1 1 -1)     | -38647.970                 | -38750.13                    | 129.396                   | -27.236                          |
| (0 1 -1)     | -9273.166                  | -9385.52                     | 129.396                   | -17.042                          |
